# Supplementary figures and images for: A Protumorigenic mDia2–MIRO1 Axis Controls Mitochondrial Positioning and Function in Cancer-Associated Fibroblasts
Source: PubMed Central journal article supplement — Cancer Res. 2022 Aug 23;82(20):3701–17. doi: 10.1158/0008-5472.CAN-22-0162 (PMC9574377; doi:10.1158/0008-5472.can-22-0162), 2022-08-23

**Fig. S1****A Endoplasmic reticulum**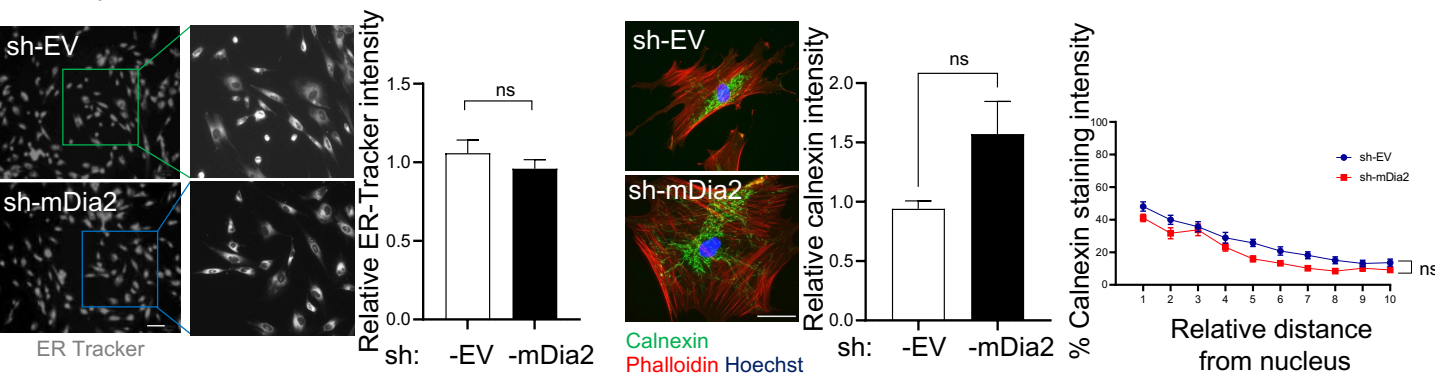**B Golgi**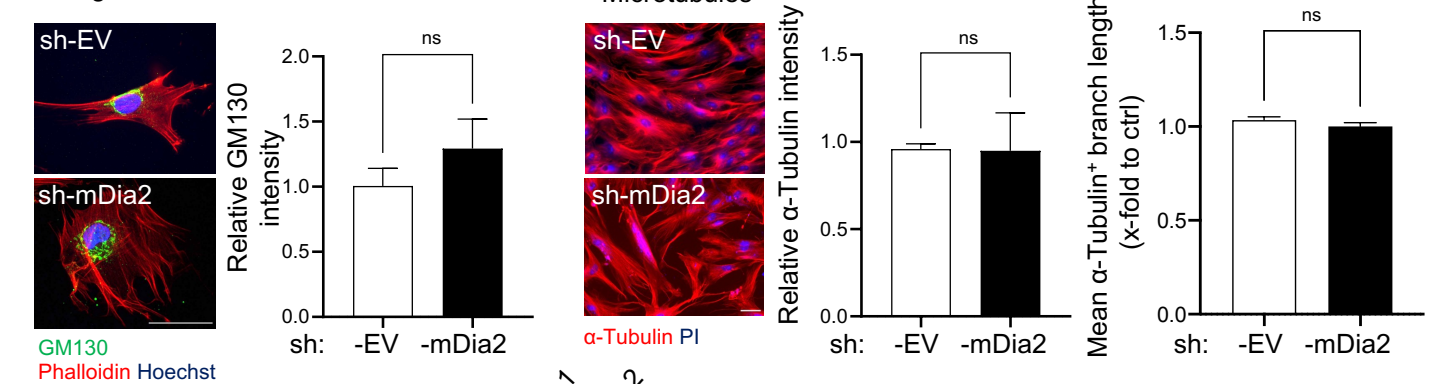**C Microtubules**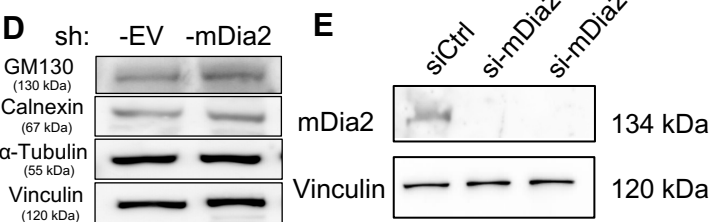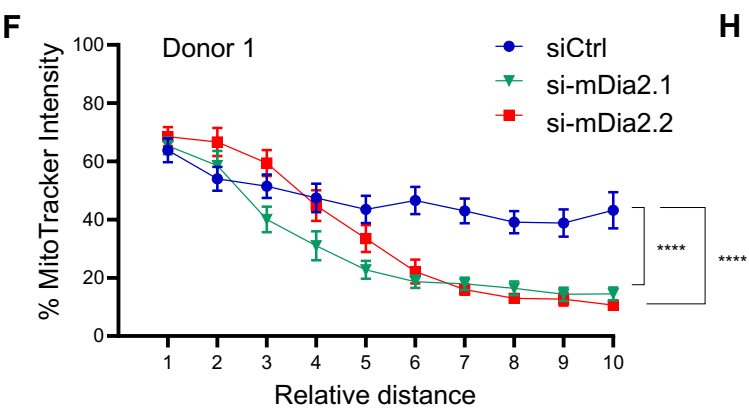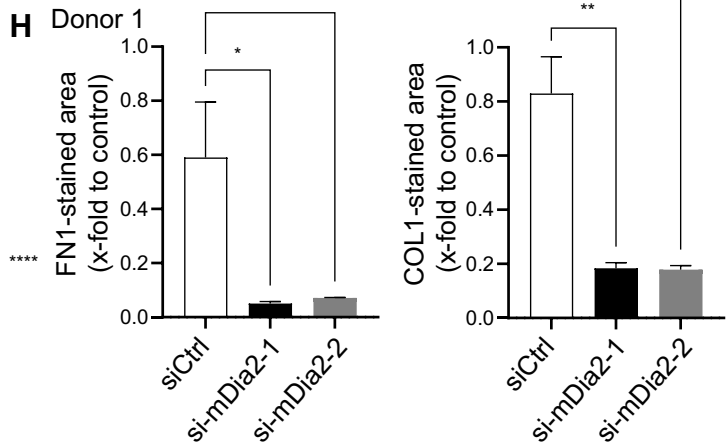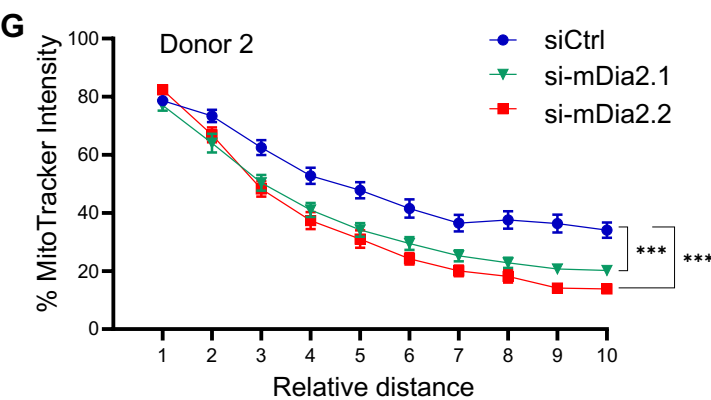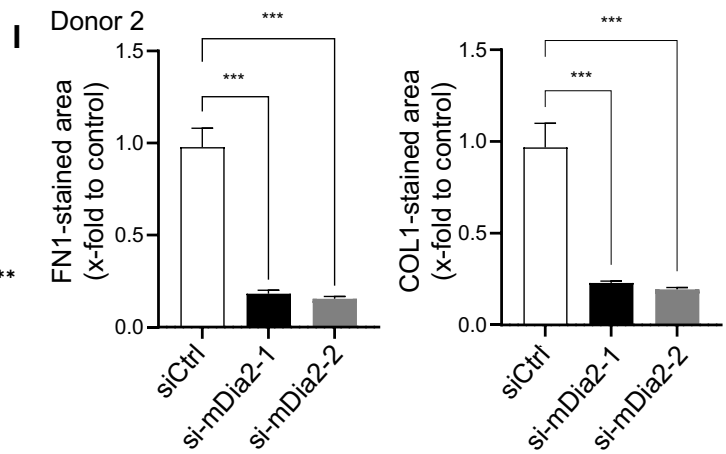

**Fig. S2**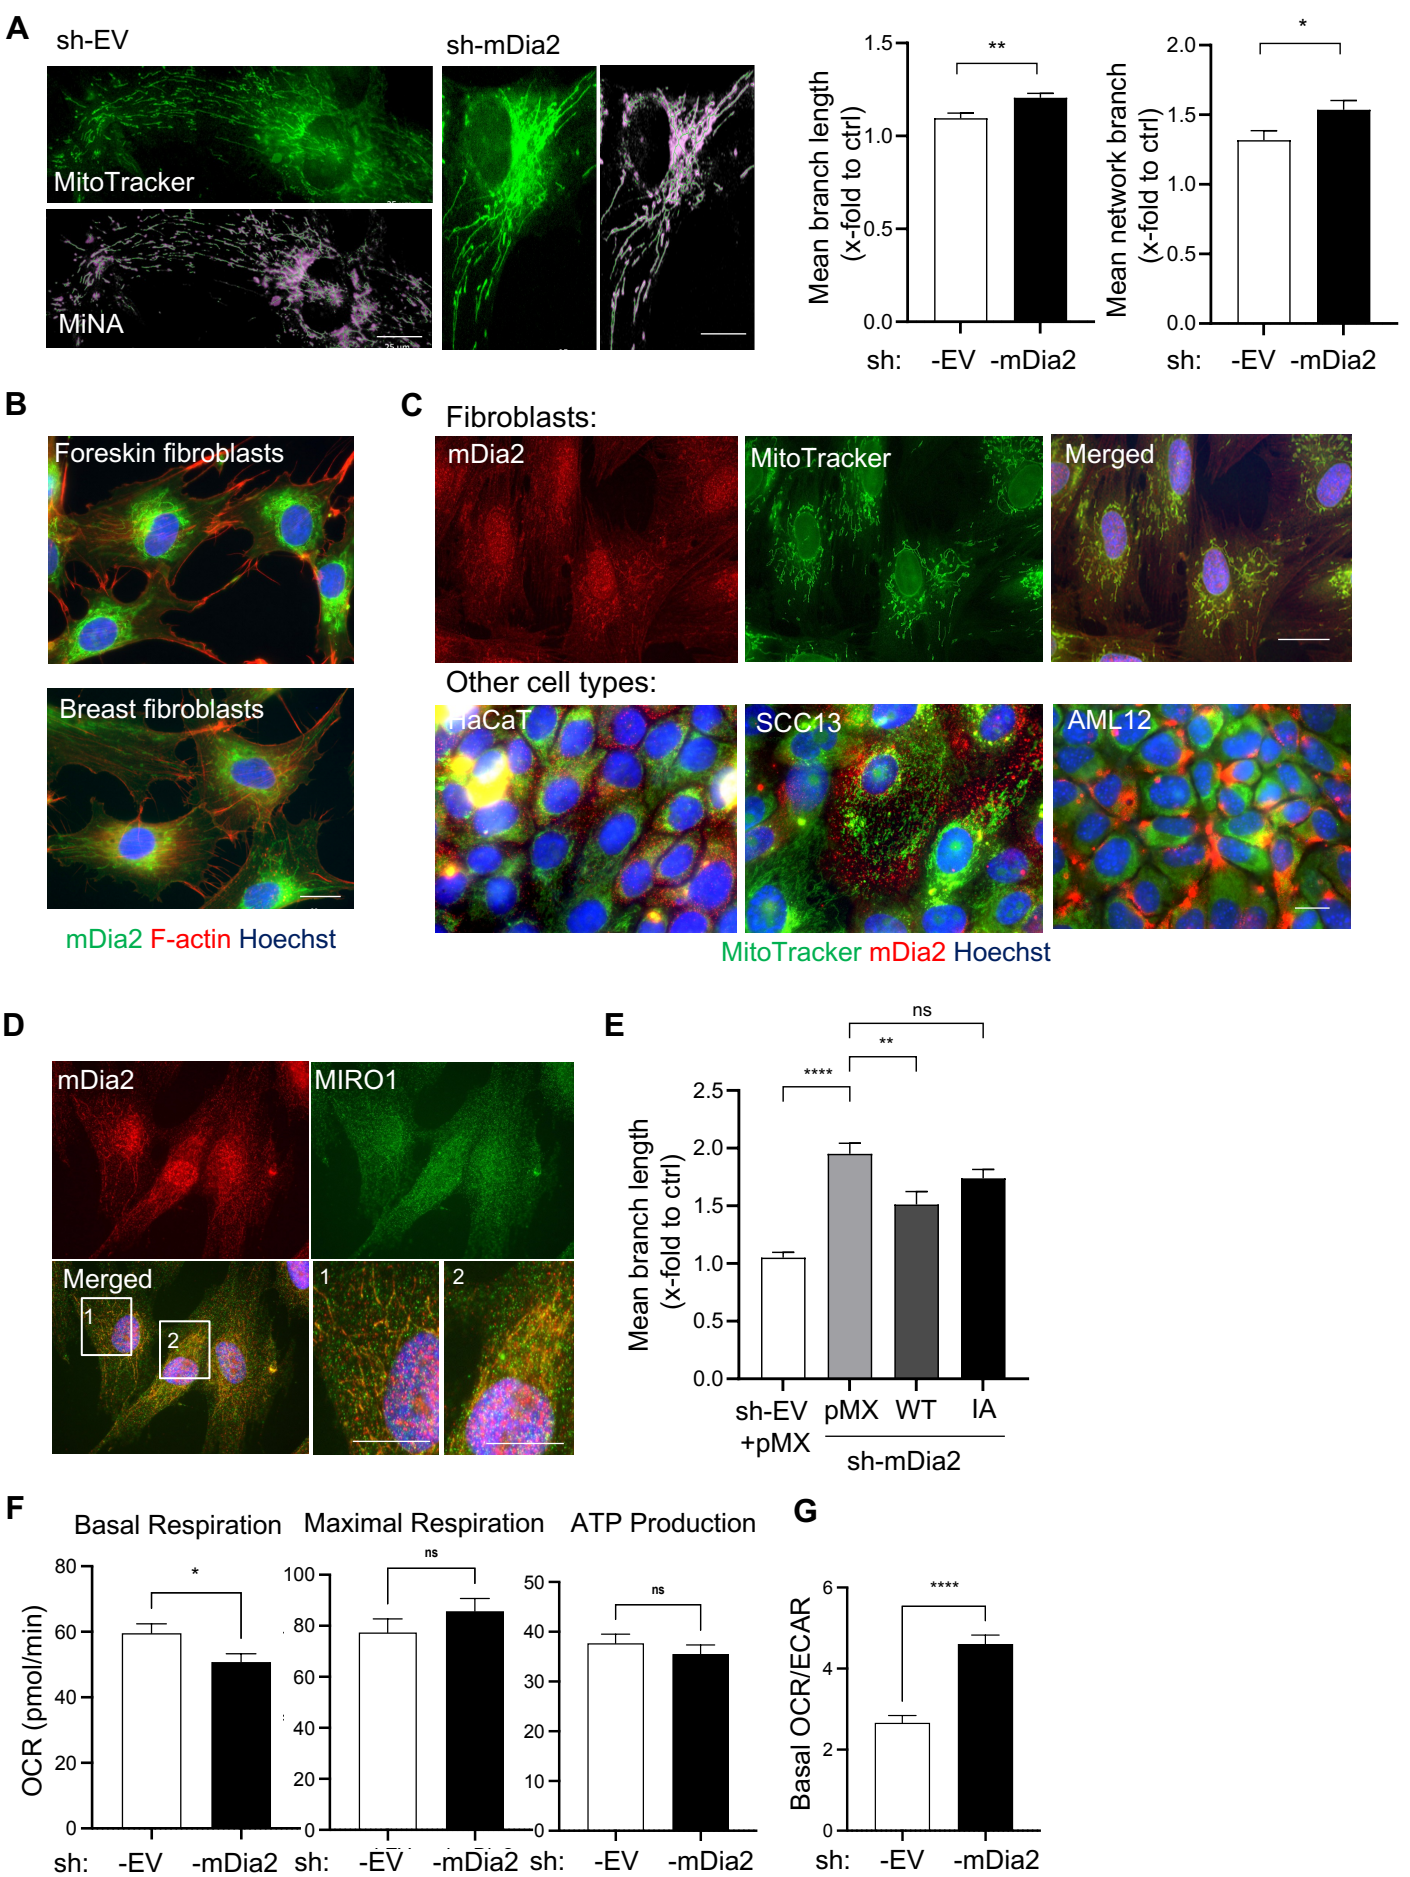

**Fig. S3**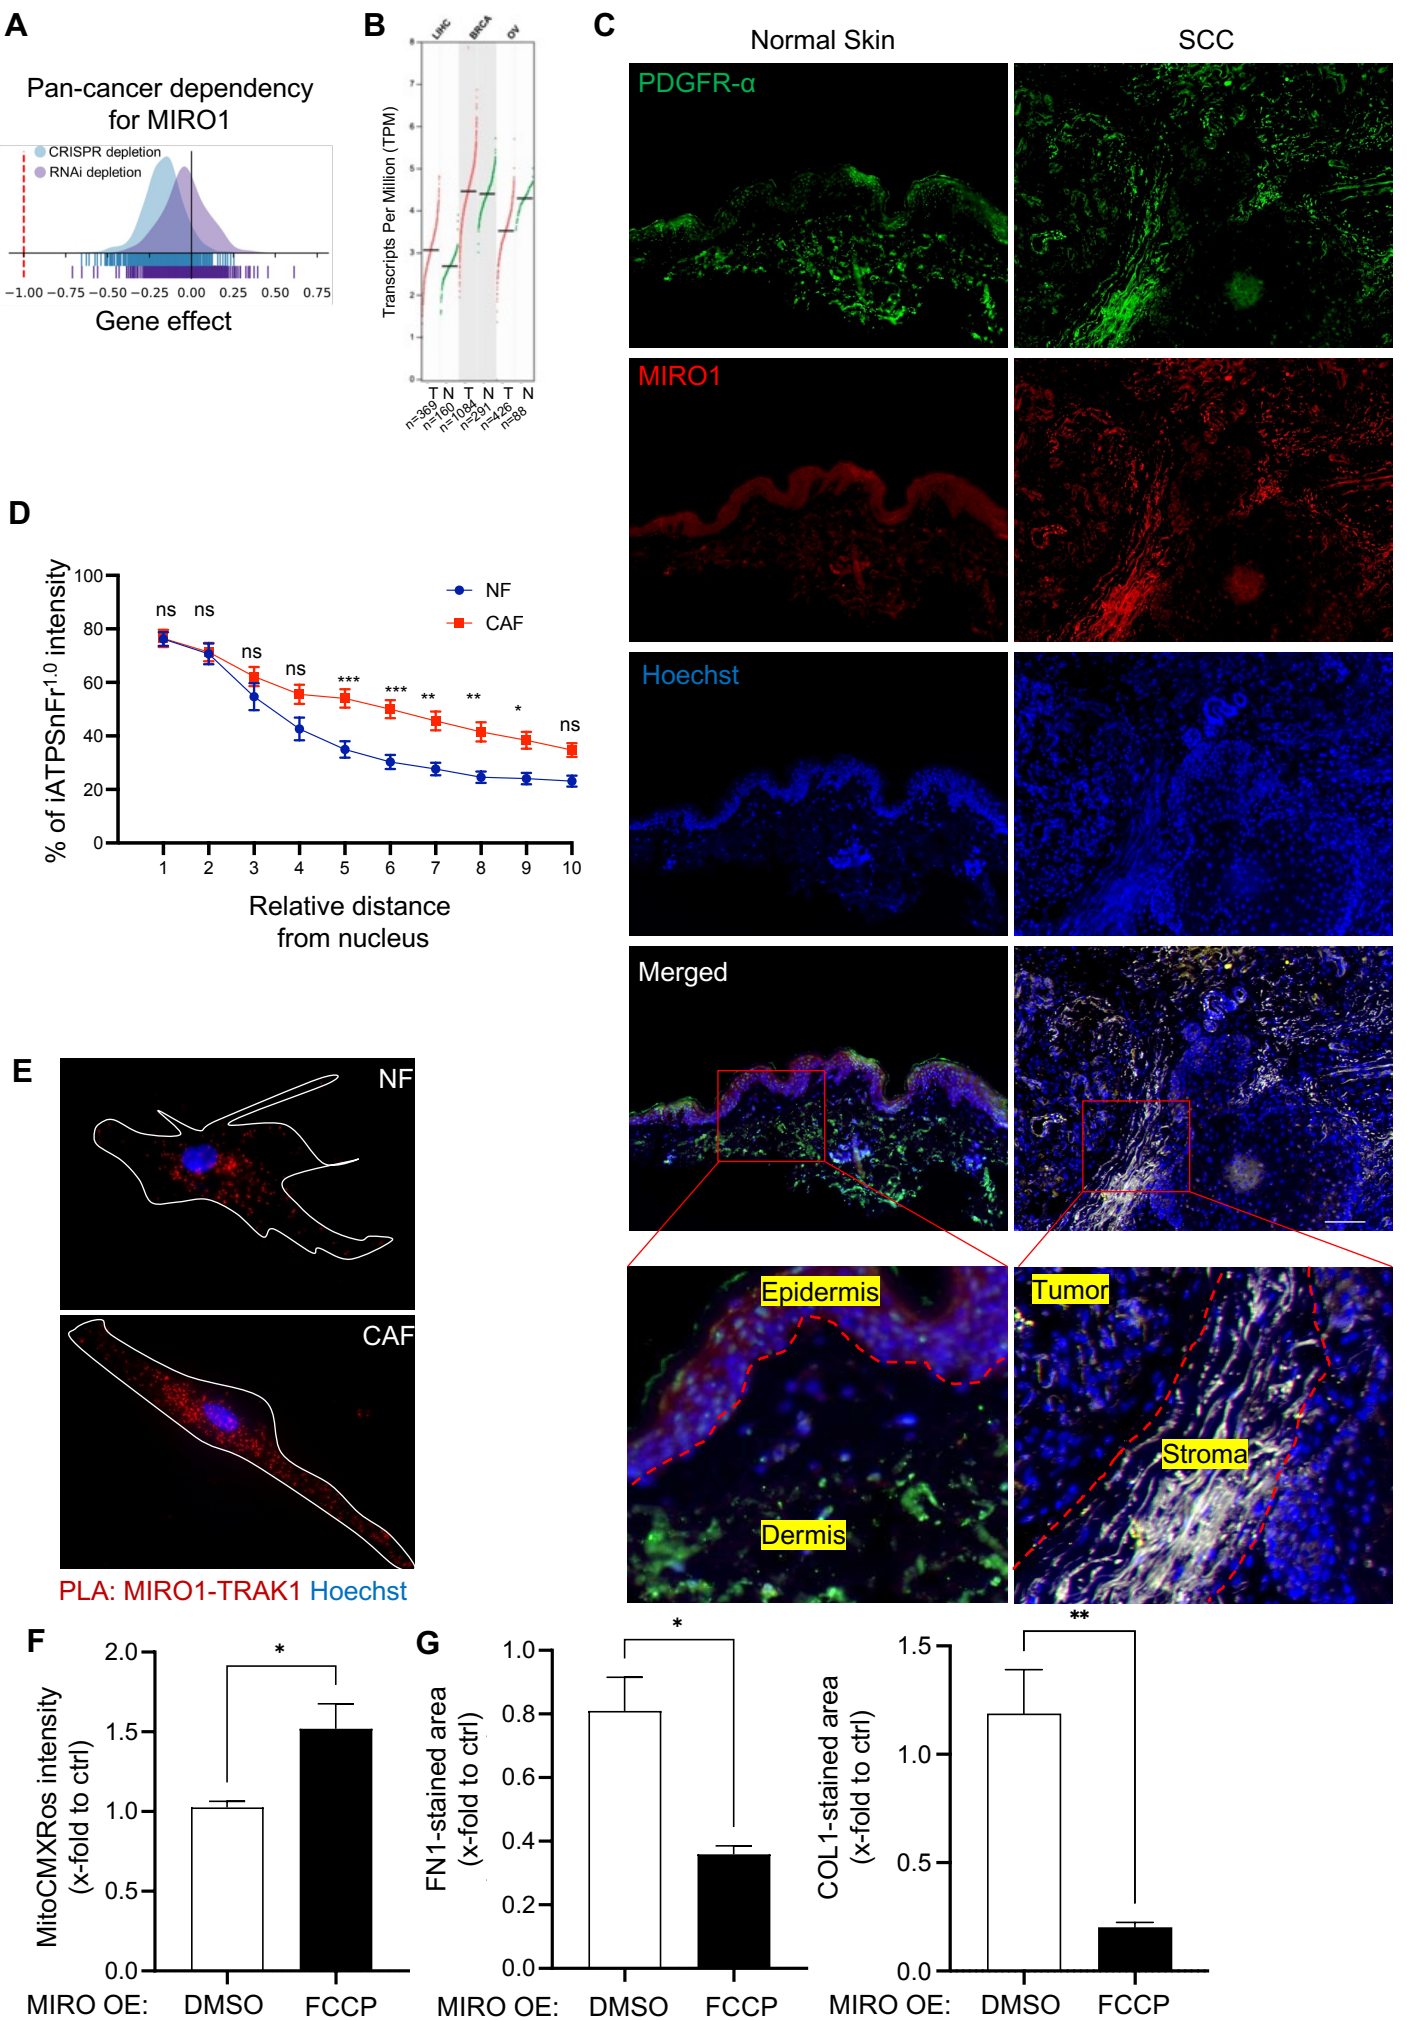

**Fig. S4**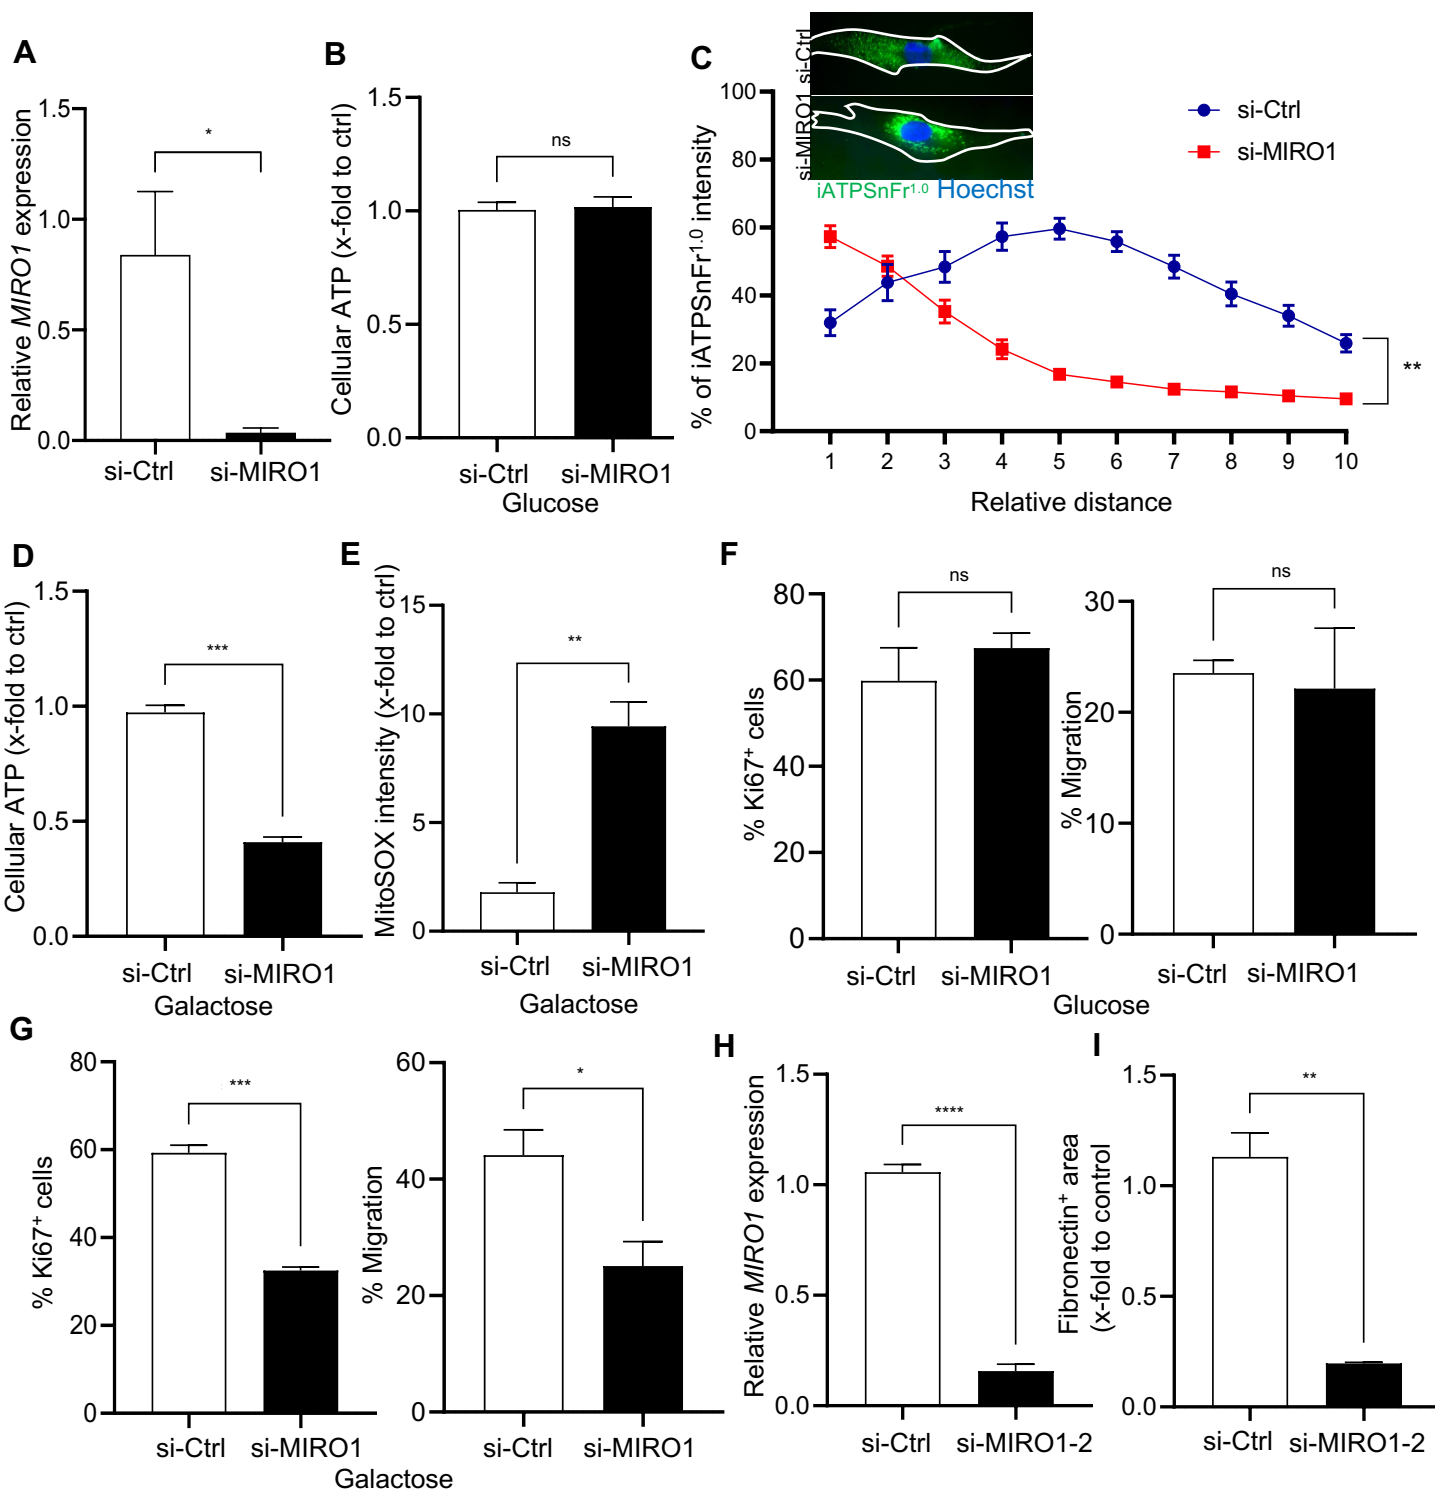

**Fig. S5**

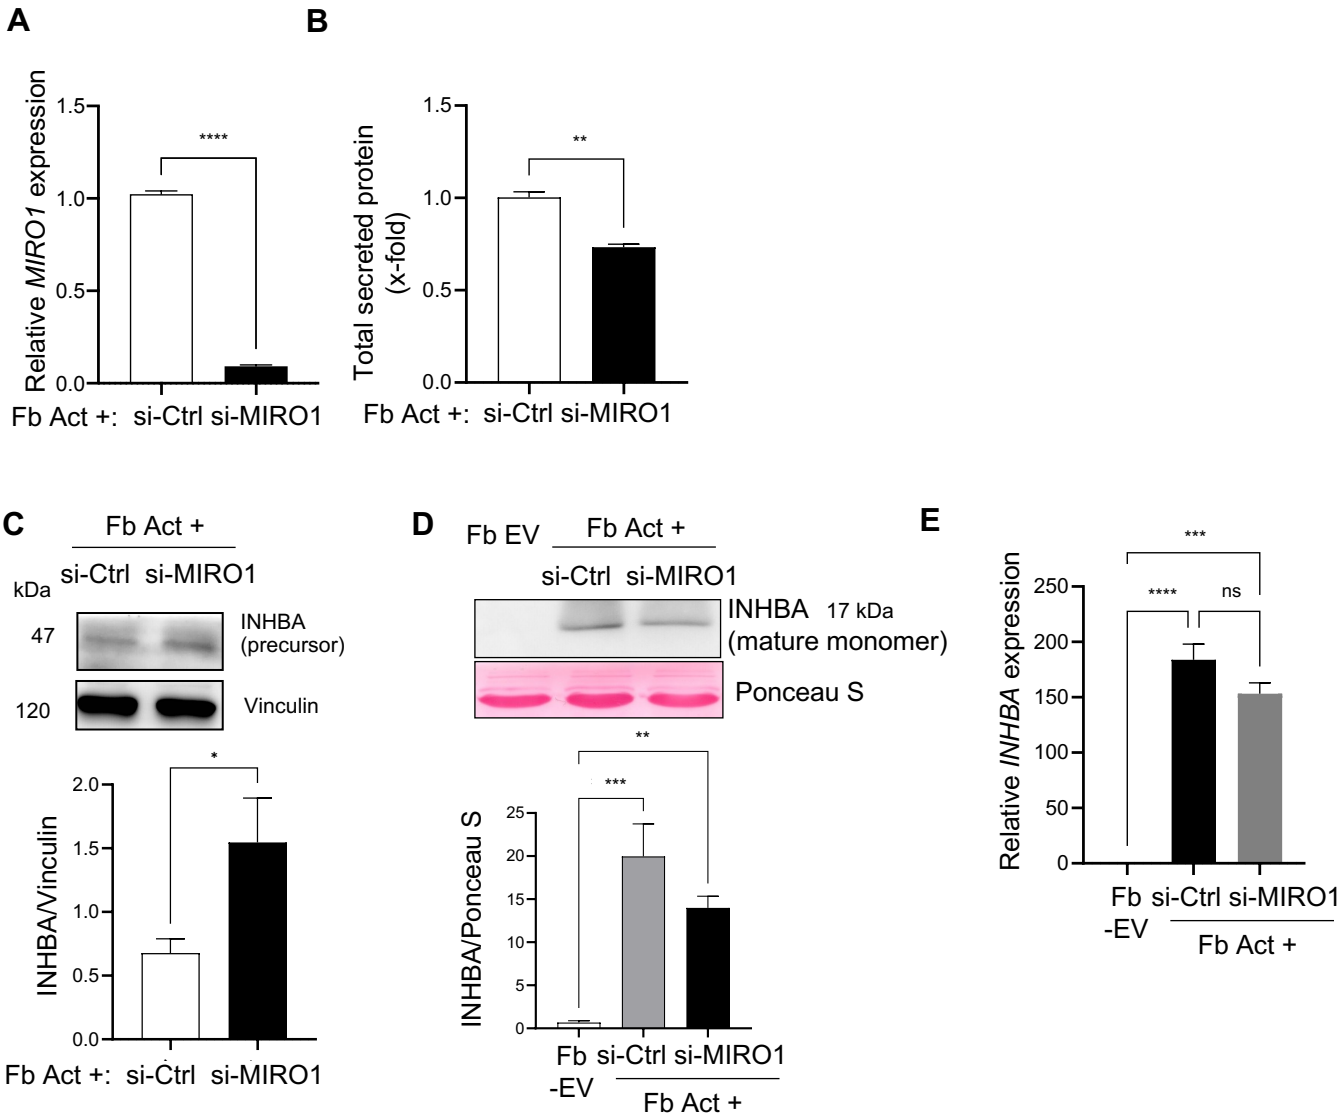

Fig. S6

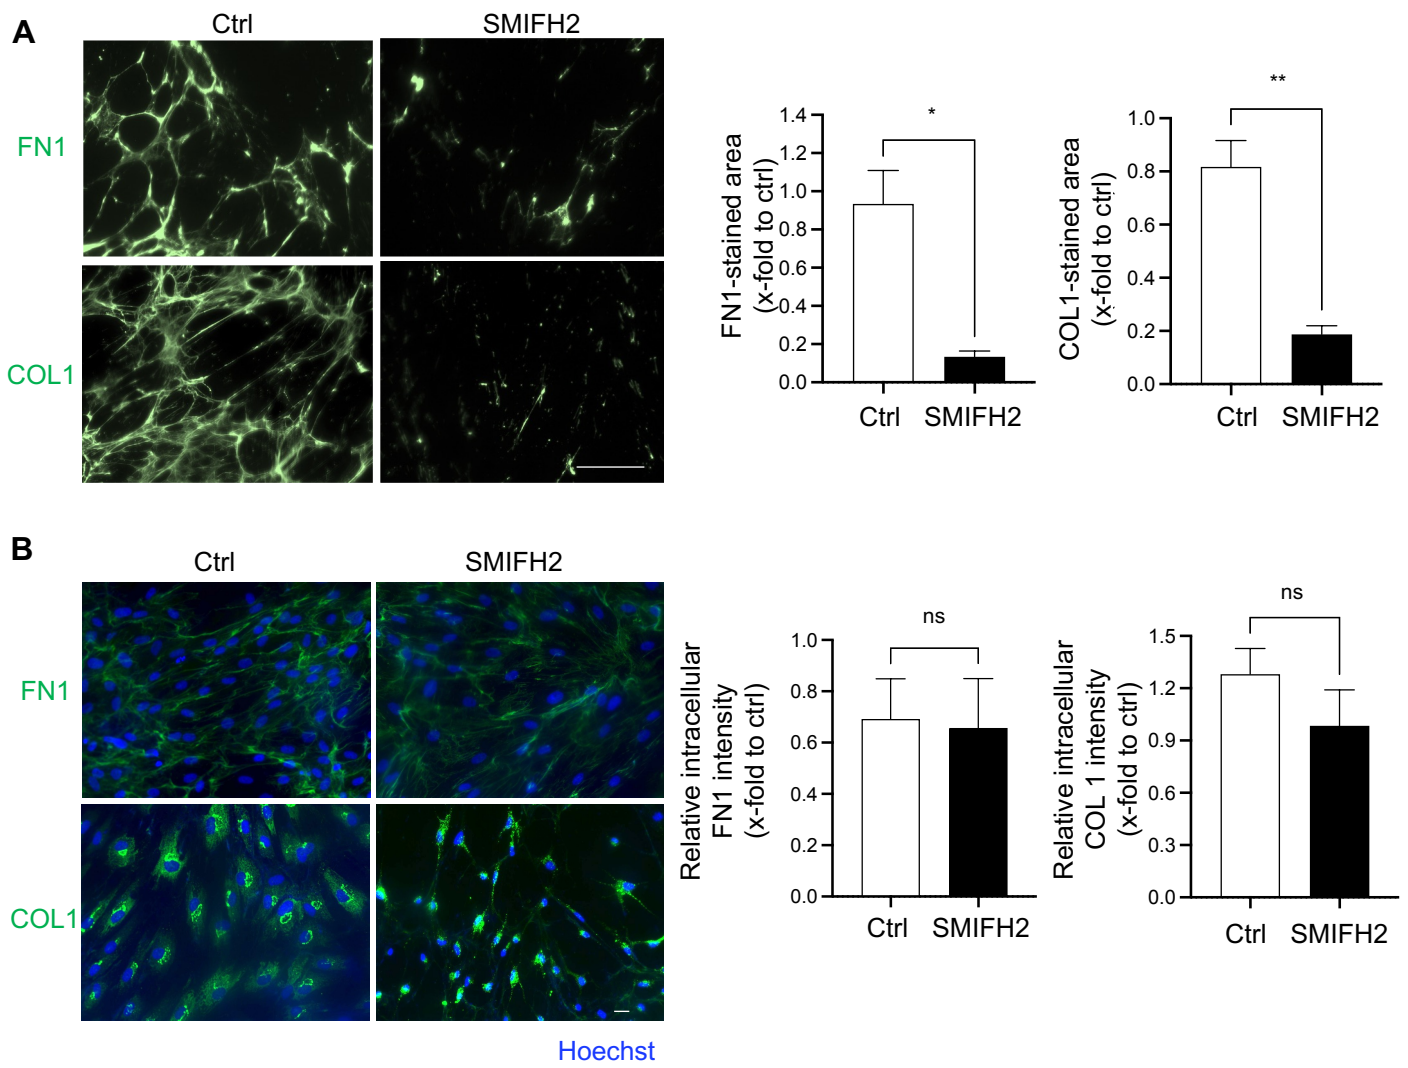

**Fig. S7**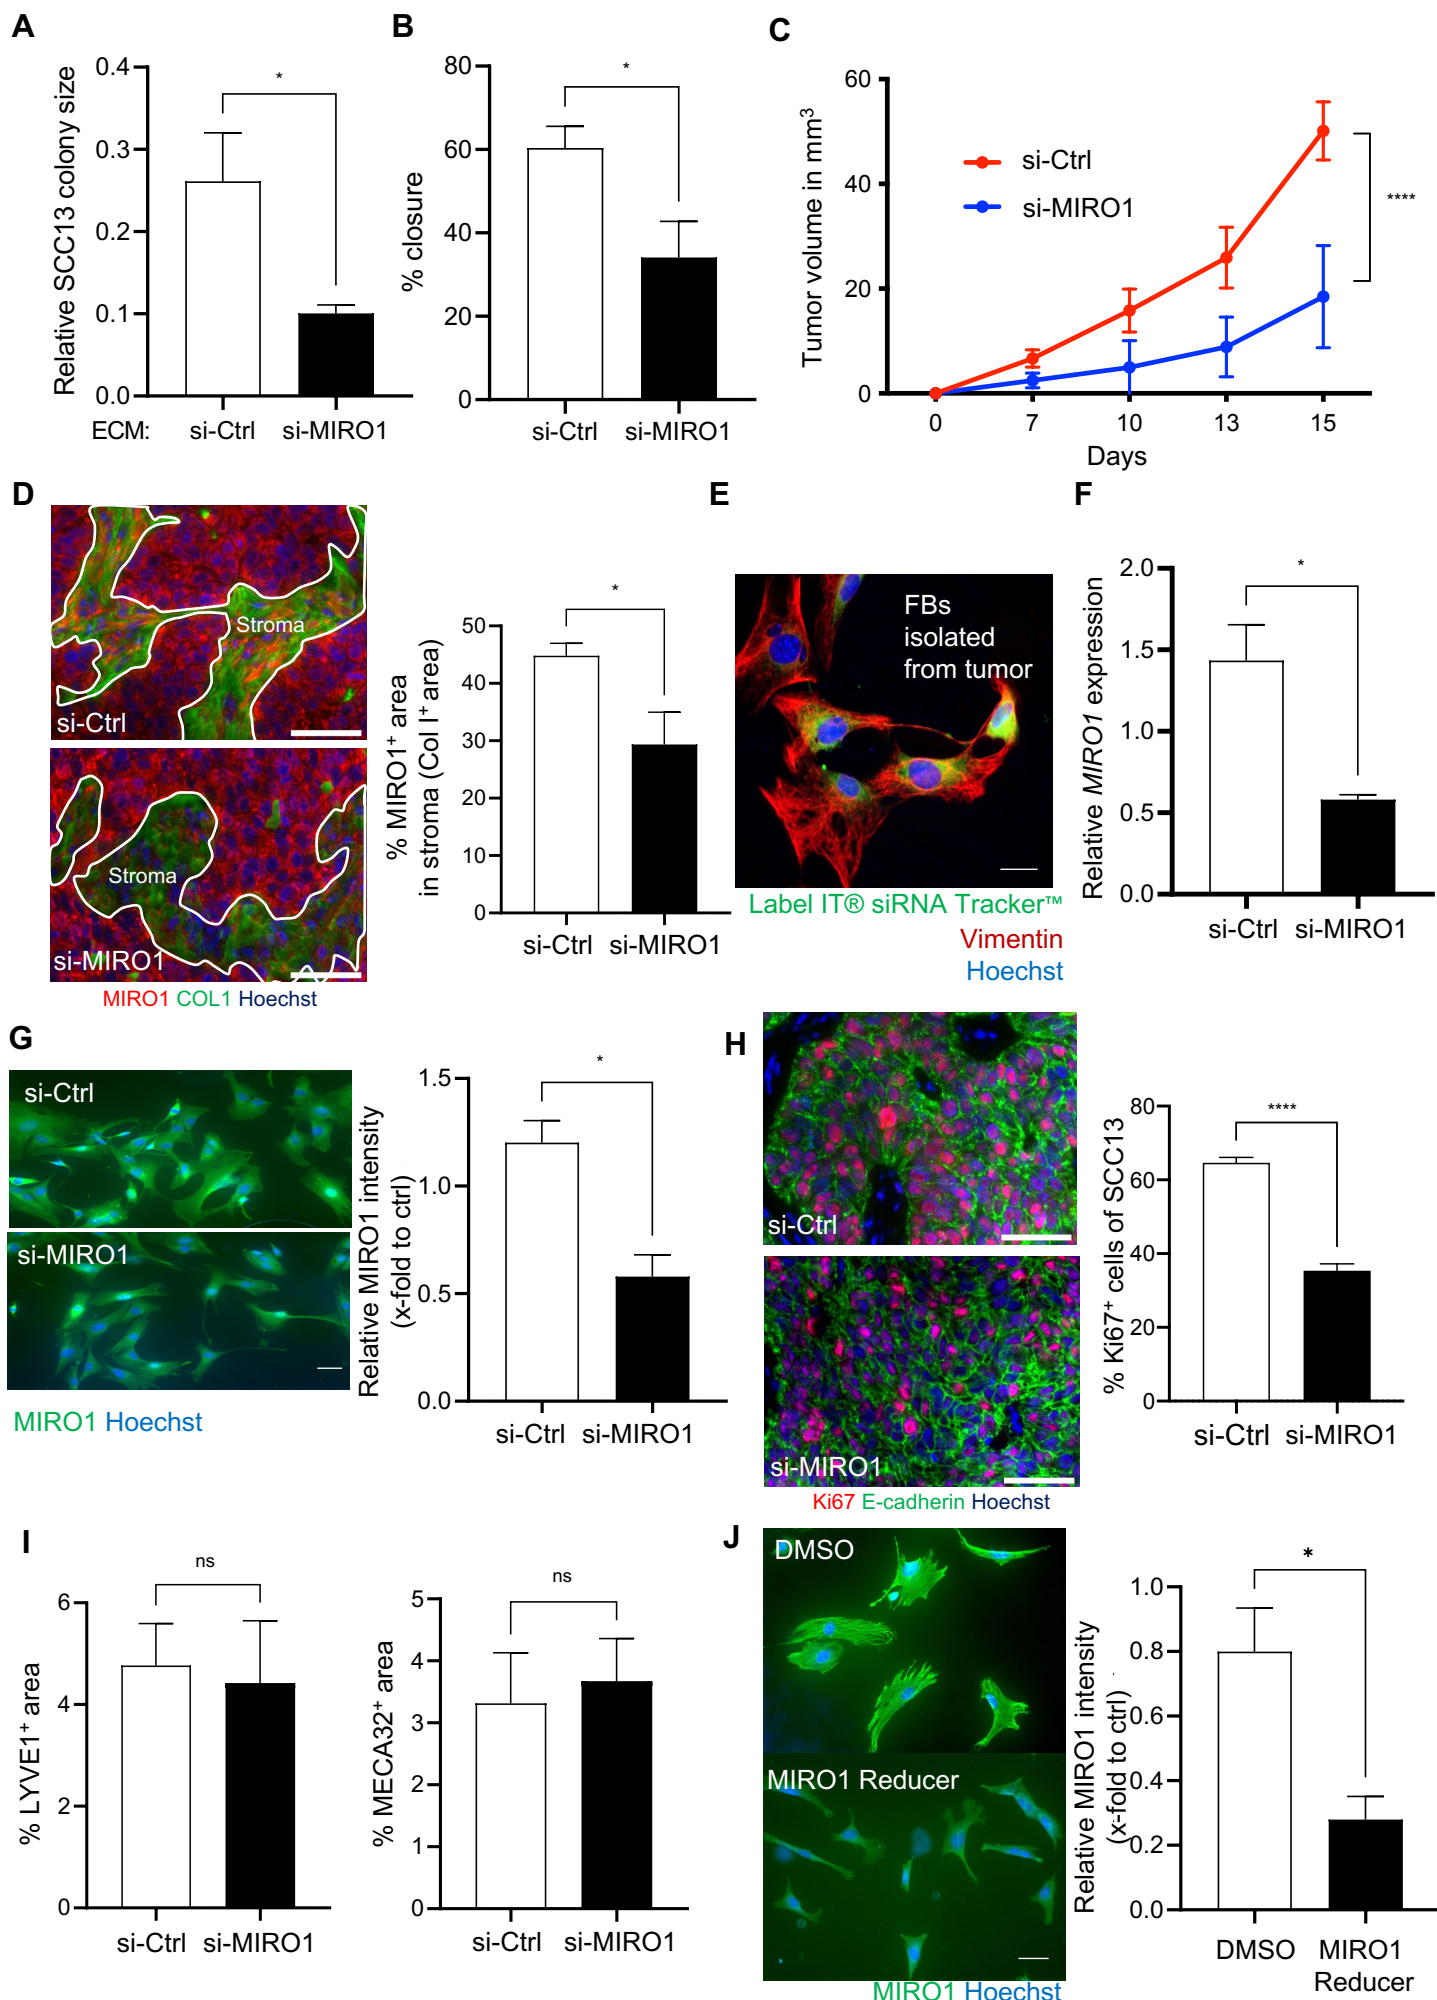

Supplement: can-22-0162_supplementary_figures_suppsf1-sf7.pdf [file can-22-0162_supplementary_figures_suppsf1-sf7.pdf]
